# Supplementary material for: Genetic and Developmental Basis for Increased Leaf Thickness in the Arabidopsis Cvi Ecotype
Source: Front Plant Sci. 2018 Mar 14;9:322. doi: 10.3389/fpls.2018.00322 (PMC5861201; doi:10.3389/fpls.2018.00322)
Supplement: Supplementary file 7 [file Data_Sheet_2.XLSX]

## Sheet: 1.cvl_all_traits.txt
genotype	LDVer.FT	LDVer.RLN	LDVer.CLN	LDVer.TLN	LD.FT	LD.RLN	LD.CLN	LD.TLN	SD.FT	SD.RLN	SD.CLN	SD.TLN	sgewicht	sphosphate	sphytate	lPhosphate	lPhytate	white	blue	red	farred	ga	brz	dark	SL	SW	FL	OL	ON	SN	Unf	TLN	LLL	PH	SSN	FN	Sw	Sucrose	Raffinose	Stachyose	CD0d	CD4d	CD4.0d	pCD0d	pCD5d	pCD4.0	germ4y	pgerm4y	lma
Cvi	21.65	5.9	2.2	8.1	28	9.41	2.18	11.59	45.36	21.83	5.14	26.97	NA	NA	NA	NA	NA	NA	NA	NA	NA	NA	NA	NA	576.5	3.51	17.53	2.43	55.5	42.88	11.875	13.43	50	36.68	4.63	41.38	2.89	23.4	1.3	0.98	99.12	31.13	31.4	7.9	4.5	4.5	100	8.7	2.38126
CVL_1	27.38	8.88	3.5	12.38	31.5	11.5	3	14.5	54.11	29.75	9.5	39.25	2.2	1.76	8.55	1.95	5.78	3.836	4.569	5.773	2.761	5.606	5.009	11.724	486.25	NA	12.25	2.146	40.75	28.25	2	25.4	49	52.13	5.75	61.5	NA	NA	NA	NA	NA	NA	NA	NA	NA	NA	78.7	5.8	1.64767
CVL_10	20	5.44	1.78	7.22	21.2	5.1	1.6	6.7	24.1	4.6	1.7	6.3	2.7	0.95	11.84	2.27	6.65	6.859	5.987	8.526	4.18	10.647	7.951	13.375	530.75	3.62	11.21	1.792	38.25	35.5	2.25	6.8	29.5	20.1	5	30.75	3.62	20.3	2.47	3.36	100	49	49	8.7	5	5	100	8.7	1.87133
CVL_101	19	4	2.33	6.33	22.44	4.89	2.22	7.11	37.78	12.89	5.33	18.22	3	0.92	10.78	1.47	8.13	4.504	6.964	8.265	4.609	5.609	9.525	15.2	517.25	2.65	13.4	1.865	60	53	6.5	6.8	30	21.2	3.75	33.75	2.65	14.7	1.55	1.98	97	22	22.7	6.9	4.2	4.3	97.6	7	1.82105
CVL_102	19.2	5.2	2.2	7.4	21.6	5.4	1.9	7.3	25.2	5.2	2.3	7.5	NA	NA	NA	1.68	5.57	6.913	8.729	12.518	6.11	8.483	10.782	17.305	579.25	3.37	14.97	1.865	45.5	42.25	3.25	7.3	32.5	38.5	3.25	27.33	3.37	18.8	0.63	0.25	100	48	48	8.7	4.9	4.9	NA	NA	2.81114
CVL_103	19.25	4.88	1.75	6.63	21	4.78	1.78	6.56	24.4	6.1	2.4	8.5	2.6	0.93	7.71	1.38	0	3.697	5.181	5.119	3.582	4.901	6.34	15.322	491.5	2.43	12.52	NA	50	36.5	11.75	6.8	21.75	27.57	3.42	28.33	2.43	18.9	1.4	2.05	98	0	0	7.1	1.3	1.3	96.5	6.8	1.80182
CVL_104	24.33	7.44	2.67	10.11	24.75	7.13	2.75	9.88	44	20.6	7.6	28.2	2.4	1.04	9.4	1.38	9.09	3.156	6.353	7.34	4.873	6.025	7.086	15.784	507.5	2.36	17.62	2.208	70.5	69.5	1	10.3	41.25	39.17	4.5	36	2.36	15.4	1.42	1.87	98	15	15.3	7.1	4	4	100	8.7	2.22176
CVL_105	22.6	6.1	2.3	8.4	25.2	7	2.1	9.1	46	19.56	4.67	24.22	2.9	0.9	9.2	2.03	6.3	4.75	6.367	7.135	4.44	6.566	7.671	15.395	476.5	2.31	16.1	2.198	59.5	58.75	0.5	10.8	39.25	48	3.75	35.67	2.31	14.6	0.91	1.91	97	2	2.1	6.9	2.9	3	95.1	6.7	2.19916
CVL_106	17.6	4	2	6	19.5	4.4	1.8	6.2	22.6	4.4	2	6.4	2.2	1.43	14.68	1.88	15.39	6.111	5.838	9.243	4.665	8.038	7.775	13.234	579.75	3.41	13.06	1.875	46.75	23.5	21.75	6.6	25.75	33.05	4	31.25	3.41	18.1	1.39	0.72	100	87	87	8.7	6.1	6.1	98.9	7.3	1.70338
CVL_107	24.4	8.4	2.5	10.9	25.3	7.7	1.9	9.6	43.7	21.5	6	27.5	2.9	1.18	12.67	1.82	11.13	5.758	6.277	9.332	5.626	7.72	8.828	14.931	533.5	2.71	18.01	2.271	70.5	60.75	9.25	8.9	45.75	34.68	4.25	33	2.71	14.2	1.83	3.1	99	8	8.1	7.3	3.6	3.6	99.6	7.6	2.24635
CVL_108	22.4	6.3	2.1	8.4	30.5	11.5	3.1	14.6	57.3	29.6	5.6	35.2	2.5	0.82	10.78	1.59	6.22	4.717	6.22	7.865	4.656	7.425	5.716	14.569	524.25	2.66	13.89	2.188	41.75	34.5	4.5	22.1	46	48.38	5.5	52.75	2.66	15.1	1.03	1.05	99	22	22.2	7.3	4.2	4.2	99.5	7.6	2.41803
CVL_109	20.4	5.7	2.2	7.9	21.3	5.4	1.9	7.3	24.9	5.5	3	8.5	3.5	0.82	10.45	1.64	7.74	3.79	5.201	6.293	3.973	5.402	4.027	13.733	511.25	3.18	8.02	1.625	41.5	25.25	16.25	7.4	21	17.15	5	37.5	3.18	17.9	1.4	0.81	100	65	65	8.7	5.4	5.4	100	8.7	2.04674
CVL_11	25.22	9.22	3.11	12.33	29.3	11.3	3.5	14.8	59.2	33.4	11	44.4	2.1	1.39	15.48	3.38	11.09	3.103	5.628	6.205	4.72	5.312	4.685	14.781	522.75	2.39	15.56	2.111	57	47.5	8	25.2	44.75	31.98	7.25	44.25	2.39	20.3	2.2	4.42	100	26	26	8.7	4.4	4.4	100	8.7	1.92068
CVL_110	23.4	6.8	2.6	9.4	24.9	6.4	2.9	9.3	41.8	15.3	6	21.3	2.1	1.1	11.5	2.2	9.43	4.673	5.876	9.174	4.647	6.986	7.641	12.276	521	2.86	14.74	2.313	59.75	54.25	5.5	11.2	37.5	43.88	5	38.25	2.86	24	0.82	0.22	100	22	22	8.7	4.2	4.2	99	7.3	1.52356
CVL_111	25.6	9.7	2.9	12.6	27.5	8.9	2.7	11.6	47.11	21.89	5.78	27.67	3	1.36	16.47	1.38	12.78	6.338	7.324	10.327	4.769	9.052	7.669	15.063	521.75	2.35	9.59	1.917	55	22.5	32	14.8	50.75	21.78	6.5	49	2.35	26.3	0.43	0.39	100	30	30	8.7	4.5	4.5	99.4	7.5	1.89399
CVL_112	17.63	4.38	2.13	6.5	21.88	6	2.63	8.63	27.3	7.6	3.8	11.4	2.3	1.18	11.06	0.8	0	4.169	5.249	7.541	4.747	6.246	6.906	13.692	495.5	2.41	10.18	1.778	47.5	39	7.5	6.22	17.75	24.25	3.25	33.25	2.41	22.7	0.96	1.85	98	1	1	7.1	2.7	2.7	99.5	7.6	1.83289
CVL_113	18.89	5	2.11	7.11	22.4	6.7	3	9.7	27.43	8.71	4	12.71	2.5	1.25	14.72	1.72	7.09	4.7	5.341	8.408	3.994	7.001	6.848	16.083	510.5	2.59	10.28	1.854	48	28	19.5	9.6	36	18.1	5.25	34	2.59	20.6	0.65	0.43	100	52	52	8.7	5.1	5.1	100	8.7	1.84134
CVL_114	20.29	5.57	2.14	7.71	21.4	5.5	2.1	7.6	26	7.1	3.1	10.2	3.2	0.84	9.76	1.13	13.52	4.595	6.024	8.447	4.303	7.003	6.11	14.442	539.75	3.08	16.22	2.031	48.5	40.5	6.25	7.8	36.25	32.33	4.75	30.25	3.08	16.5	1.33	0.85	86	79	91.9	6.1	5.8	6.4	99.6	7.6	2.59372
CVL_115	18.9	4.8	1.9	6.7	26.7	9.1	2.5	11.6	51.2	27.2	5.6	32.8	3	1.27	17.08	1.37	10.3	5.687	6.31	7.282	3.847	7.303	5.626	15.307	495.5	2.69	9.4	1.917	50	30.25	17.5	12.4	41.25	25.75	5	55.5	2.69	17.7	0.84	2.79	99.99	88	88	8.7	6.2	6.2	99.4	7.5	2.20559
CVL_116	20.8	5.8	2.2	8	24	7	2.4	9.4	34.33	11.88	4.63	16.5	2.7	1.67	13.89	2.73	12.57	5.527	7.08	10.216	4.919	7.466	6.776	16.088	472.5	2.73	17.4	2.177	60.75	57.25	3.5	10.2	35.75	32.13	4	35.5	2.73	19.6	0.7	0.27	99.99	31	31	8.7	4.5	4.5	100	8.7	2.23793
CVL_117	19.2	5.1	1.9	7	21.2	4.8	1.9	6.7	25.7	7.4	2.8	10.2	3.2	1.08	9.24	2.05	18.78	4.769	5.716	8.654	5.19	6.644	8.106	14.947	551.25	3.15	9.44	1.875	39.25	19	17.5	7.7	27.75	16.53	4	27.75	3.15	21.6	0.39	0.09	98	42	42.9	7.1	4.8	4.8	96.1	6.8	3.28513
CVL_118	29.1	13.1	4.3	17.4	34.9	18.9	6.5	25.4	62	43.56	9.67	53.22	2.1	1.43	15.88	2.38	14.96	3.203	4.115	6.394	3.764	4.561	4.381	12.326	468	1.95	10.92	2.073	59	36.25	20	31.6	46.5	20.73	9.25	50.5	1.95	13.6	1.79	3.13	99	5	5.1	7.3	3.4	3.4	100	8.7	1.50034
CVL_119	16.3	4.3	2	6.3	19	4.8	1.8	6.6	23.78	5.67	3.11	8.78	2.7	1.28	16.05	1.73	10.43	4.545	5.507	6.362	3.91	5.755	7.084	14.933	505.25	2.05	9.62	1.76	43.25	28.25	12.75	7.5	19.25	17.75	4.25	39.33	2.05	26	0.59	0.4	99.99	84	84	8.7	6	6	100	8.7	2.01624
CVL_12	19.44	5.33	1.78	7.11	20.6	4.9	1.8	6.7	27.4	5.4	2.5	7.9	2.4	1.28	13.2	1.48	0	5.159	6.237	9.16	4.213	8.014	7.715	15.079	534.75	2.72	15.08	2.01	55.25	50.75	4	7.2	28.25	29.98	4.5	26	2.72	23.9	0.54	0.23	100	36	36	8.7	4.6	4.6	99.6	7.6	2.3853
CVL_120	21.1	5.9	2.2	8.1	25.1	7.6	3.1	10.7	43	15.88	4	19.88	3.1	1.1	14.36	2.44	15.26	4.323	6.033	6.849	3.81	6.075	6.817	14.2	491.5	2.31	11.61	1.917	51.75	46.75	4	9.5	32.5	29.5	3.5	54.25	2.31	19.3	0.33	0.09	99.99	81	81	8.7	5.9	5.9	100	8.7	2.08128
CVL_122	20.8	4.5	2.6	7.1	22.78	5.33	2.44	7.78	40.56	15.11	5.44	20.56	3	1.27	12.42	2.12	9.26	3.709	4.815	6.097	3.776	6.108	7.933	13.512	531	2.73	13.68	1.833	52	44.5	7.25	7.8	31.75	19.4	4	31	2.73	16.5	0.51	0	94	25	26.6	6.6	4.3	4.4	89.3	6.2	1.95447
CVL_123	23	8.17	2.67	10.83	24.44	8.33	2.56	10.89	32.4	9.9	3	12.9	2.4	0.87	9.54	1.84	9.39	7.249	9.041	10.04	6.654	9.301	8.662	16.823	507	3.25	17.01	2.135	58.5	48.75	9	9.7	38.5	27.68	3.5	30	3.25	20.1	1.3	0.66	99.99	86	86	8.7	6.1	6.1	100	8.7	2.60195
CVL_124	18.6	5.1	1.9	7	20	5.6	2.1	7.7	23.25	5.25	2.25	7.5	3	1.2	14.06	2.38	16.39	5.344	5.173	7.049	4.185	7.066	4.657	14.962	519.5	2.74	9.27	1.594	50.25	41.25	7.25	7.7	20.25	19.75	4.25	36.5	2.74	23.6	2.16	3.74	99.99	94	94	8.7	6.6	6.6	100	8.7	1.65444
CVL_125	22.4	6.4	2.3	8.7	25.1	6.6	2.4	9	48.9	21.2	6.1	27.3	1.8	1.07	9.48	1.18	8.09	5.579	5.679	6.789	4.21	6.094	5.762	15.866	489.75	2	15.78	1.917	71.75	67	4.5	8.6	49	47.53	3.5	43.75	2	17.9	1	3.44	94	2	2.1	6.6	2.9	3	100	8.7	2.22932
CVL_126	23.67	7.11	2.56	9.67	26	7.6	2.2	9.8	42.11	17.56	4.22	21.78	2.3	1.48	10.38	1.87	12.65	3.852	6.086	9.385	6.303	5.397	10.126	14.901	562	2.72	15.21	2.083	62	39.5	22.5	9.86	35.5	36.85	3.5	34.5	2.72	23.4	0.67	0.43	97	16	16.5	6.9	4	4	100	8.7	2.13231
CVL_127	22.6	7.9	2.4	10.3	34.5	16.2	5.1	21.3	61.67	36.11	11	47.11	2.2	1.17	11.14	1.66	8.39	3.459	5.237	5.758	3.249	5.233	5.138	13.896	512.5	2.52	13.24	2.344	36.5	31.5	1.25	25	42.5	43.88	6.25	52.25	2.52	17.8	1.67	4.14	96	12	12.5	6.8	3.8	3.8	99.2	7.4	2.32458
CVL_128	23.5	6.6	2.5	9.1	27.5	8.9	2.2	11.1	45.8	21.6	5.3	26.9	2.7	1.47	13.1	1.57	12.35	6.56	7.669	9.651	4.168	9.843	9.065	17.247	526.75	2.73	15.71	2.354	60.25	53.75	6	12.1	46	49.73	4.5	48.5	2.73	20.5	1.58	0.63	89	21	23.6	6.2	4.2	4.3	69.9	5.5	2.02658
CVL_129	22.9	6.5	2.2	8.7	24.4	7.1	2.8	9.9	30.43	8.86	3.14	12	2.6	1.59	15.17	2.28	9.61	6.6	7.497	10.3	4.264	9.776	6.765	15.376	493.5	2.43	17.41	2.236	61	56.5	4	9.3	41	32.35	3.25	25.75	2.43	23.7	0.96	0.58	99	44	44.4	7.3	4.8	4.9	97.6	7	2.22856
CVL_13	16.8	4.1	1.9	6	18.11	4.11	1.67	5.78	21.13	4.25	2.5	6.75	2.5	1.31	11.74	3.29	9.83	6.178	6.512	9.435	4.059	6.84	5.213	14.799	544	2.8	8.1	1.729	33.5	27.25	4.75	6.3	18.5	16.13	3.25	31	2.8	19.4	1.93	4.72	100	82	82	8.7	5.9	5.9	100	8.7	1.90302
CVL_130	27.7	9.7	2.8	12.5	42.6	23.2	6.2	29.4	65.13	44.5	8.38	52.88	3.6	1.25	12.53	1.59	14.3	4.354	5.556	6.083	3.722	6.861	5.72	14.569	509.75	2.19	14.36	2.125	53	42.25	10	33.6	48.67	36.1	7	45	2.19	16.9	3.47	5.71	99.99	1	1	8.7	2.7	2.7	99	7.3	2.32681
CVL_131	19.22	3.43	2	5.43	20.6	3.8	2	5.8	23	4	2.1	6.1	NA	NA	NA	2.52	16.65	3.89	4.576	5.798	2.918	5.373	4.922	12.85	460.5	1.84	12.13	1.847	43.25	32.25	8	5.7	20	38	5.5	36	1.84	22.9	2.46	3.47	92	11	12	6.4	3.8	3.8	92.2	6.4	1.31537
CVL_132	23.9	6.7	3.3	10	36.5	15.1	4.4	19.5	59.33	37.89	8.89	46.78	3.2	1.58	15.22	3.71	26.91	3.643	4.981	5.801	3.915	4.811	5.336	11.819	541.25	2.59	12.64	1.833	56.5	50.25	5.75	23	44	20.9	8	39.25	2.59	20.4	3.32	3.63	77	24	31.2	5.7	4.3	4.5	88.3	6.2	2.52256
CVL_133	20	5.11	1.67	6.78	23.8	6.7	2.3	9	46	17.67	5.22	22.89	2.7	0.93	8.69	2.02	10.22	4.445	4.817	6.736	3.186	5.317	5.629	13.825	467	2.15	10.7	1.781	56.25	54.75	1.25	8.5	34	25.5	4.75	45.25	2.15	17.8	1.73	2.52	99	4	4	7.3	3.2	3.3	99.6	7.7	1.69859
CVL_134	21.2	6.3	2.1	8.4	20.8	5.6	1.8	7.4	25	6.4	2.2	8.6	3.2	1	13.01	1.66	12	6.041	8.155	9.889	6.595	8.392	8.177	15.727	527.25	2.95	14.4	2.073	52.5	43.25	7.75	7	26	30.5	3.25	24.75	2.95	16.4	3.52	4.92	99.99	70	70	8.7	5.5	5.5	100	8.7	2.20268
CVL_135	21.3	6.4	2.3	8.7	23.4	6.7	2.6	9.3	29.78	9.11	2.89	12	3.7	0.99	10.68	1.76	12.22	6.42	6.763	9.819	4.887	8.606	6.72	14.037	548.25	3.27	9.61	1.729	42	32	6.25	9.5	31.25	30.63	4.5	45.25	3.27	20	2.07	2.02	99.99	91	91	8.7	6.3	6.3	99.5	7.6	2.5714
CVL_136	18.7	5.1	1.8	6.9	20.2	4.5	1.4	5.9	23.8	5	2	7	2.5	1.6	16.79	1.89	22.3	4.638	3.501	7.982	3.694	5.223	5.587	12.434	498.5	2.63	8.97	1.708	43.5	26.25	15.25	6	16	13	3.5	21.25	2.63	22.9	1.84	2.14	99.99	13	13	8.7	3.9	3.9	97.7	7	1.64571
CVL_137	22.5	6.6	2.3	8.9	26.6	7.5	2.6	10.1	41.33	16.22	4	20.22	3.3	1.39	12.19	2.52	12	3.783	5.61	7.145	4.489	6.284	7.501	16.215	498	3.02	18.48	2.125	66.5	60.25	5.5	11.3	46.25	43.53	5	39.75	3.02	19.3	1.74	0.65	99	27	27.3	7.3	4.4	4.4	95.6	6.7	1.62794
CVL_138	23	6.4	2.7	9.1	26	7	3.13	10.13	42.4	16.5	6.3	22.8	2.7	0.98	10.92	2.36	11.52	4.941	6.498	7.654	4.468	7.012	6.361	14.592	502	2.12	11.15	1.698	58	50	7.75	8.3	35.75	24.58	4	45.5	2.12	15.8	1.91	2.15	99.99	1	1	8.7	2.7	2.7	100	8.7	1.79254
CVL_139	22	6.4	2.2	8.6	23.1	6.3	2.6	8.9	41.9	19.3	5.7	25	2.6	1.47	13.57	2	15.52	4.458	6.804	6.953	5.21	5.954	8.469	16.079	500.5	2.17	17.09	2.229	65.33	52.33	12.33	8	37.5	24.03	4.5	27.75	2.17	18.2	2.58	3.06	40	0.01	0	4.7	1.3	1.5	99.5	7.5	1.58481
CVL_14	25.1	8.8	2.6	11.4	28.9	11.2	3.2	14.4	48.44	26.33	10.38	37.25	1.9	1.09	8.33	2.45	3.65	3.166	4.066	5.271	3.405	4.88	4.366	11.601	515	1.88	8.93	1.844	42.25	33	7	25	38.5	28.93	8.75	58.25	1.88	16.5	2.73	4.41	99	6	6.1	7.3	3.4	3.5	100	8.7	2.40235
CVL_140	19.89	4.89	2.11	7	21.6	4.9	2	6.9	25.5	6.2	2.6	8.8	3.3	1.49	15.94	2.62	12.83	6.838	8.013	9.87	5.34	8.911	9.002	17.122	513.5	2.9	14.4	2.052	54.25	42.5	11.75	7	23.5	24.18	3.75	23.5	2.9	23.8	1.98	2.15	99	21	21.2	7.3	4.2	4.2	98.9	7.3	1.82247
CVL_141	27	8.8	2.5	11.3	29.3	9.5	1.9	11.4	49.86	23	5.43	28.43	2.6	1.28	11	1.58	7.74	4.629	5.501	6.674	4.432	7.121	5.046	14.34	452.25	2.31	11.3	2.021	55.5	49.25	6	12.1	48.5	48.23	3.75	56.5	2.31	13.4	3.93	3.57	90	37	41.1	6.3	4.7	4.8	98.1	7.1	2.21016
CVL_142	20	4.8	1.8	6.6	22.6	5.5	1.9	7.4	27.4	7.4	3.1	10.5	2.6	0.98	10.28	1.92	16.09	5.366	5.883	8.399	4.097	8.116	5.6	14.498	503.25	3.15	10.41	1.698	37.5	36	1	7.8	27.5	22.13	4.75	43.5	3.15	16.2	1.79	3.58	99.99	31	31	8.7	4.5	4.5	100	8.7	2.62063
CVL_143	19.6	4.5	1.6	6.1	21.5	4.6	1.4	6	33.3	8.4	3.2	11.6	2.3	0.89	8.6	2.01	9.74	5.467	6.825	8.691	3.942	9.058	8.459	17.845	553	2.78	13.87	2	51	46.5	2.25	6.6	35.5	33.18	3.5	24	2.78	17.5	1.96	3.06	90	5	5.6	6.3	3.4	3.4	98.1	7.1	1.87811
CVL_144	22.3	5.6	1.8	7.4	30.9	11.3	2.1	13.4	65	35.38	4.88	40.25	2.6	0.95	9.34	1.91	14.13	5.277	6.443	9.154	5.084	7.953	6.846	14.337	546.75	2.76	11.83	1.948	48.5	40	8	20.2	46.5	26.03	4.75	51	2.76	21.2	1.94	3.96	96	19	19.8	6.8	4.1	4.2	100	8.7	2.63566
CVL_145	19.5	5.5	2.8	8.3	20.89	5.33	2.67	8	24.6	5.3	2.8	8.1	2.7	1.49	16.39	2.79	17.22	4.459	5.328	7.903	4.442	5.658	4.909	13.864	521	2.72	8.21	1.615	54	27.75	22.25	7.9	20.25	17.88	4	40.5	2.72	25.6	0.96	0.45	99.99	88	88	8.7	6.2	6.2	100	8.7	1.94901
CVL_146	30.11	11.11	4.78	15.89	37.89	21.56	8.56	30.11	62.88	37.63	11.88	49.5	2.1	1.22	11.15	2.18	6.74	2.663	3.784	5.835	3.598	4.187	4.672	11.58	459.75	1.59	9.61	1.906	53.5	38.5	4.5	32.8	35.5	31.08	12.75	49.75	1.59	19.3	1.22	2.66	98	7	7.1	7.1	3.5	3.5	97.2	6.9	2.04337
CVL_147	19.8	5.3	1.7	7	23.7	6.9	2.6	9.5	44.25	20.63	6	26.63	3.3	0.99	10.14	1.86	6.35	3.625	6.145	4.577	3.898	5.245	5.486	15.408	494.75	2.43	13.15	2.167	59.5	51.5	7.25	10.2	37	25.38	4.75	41.5	2.43	18	1.6	2.53	74	1	1.4	5.6	2.7	2.8	100	8.7	1.82712
CVL_148	21	5.7	2.2	7.9	22.9	6.3	3.1	9.4	38.71	11.86	5.71	17.57	2.2	1.6	14.25	2.61	27.74	3.98	4	6.926	4.549	5.101	5.177	13.841	456.75	2.21	10.16	1.917	57.25	47.75	7.5	9	26	27.5	4.75	52.5	2.21	27.2	1.22	0.37	99	56	56.6	7.3	5.2	5.2	98.5	7.2	1.41247
CVL_149	21.89	6.78	2.44	9.22	23.2	7.1	2.8	9.9	35.1	12.6	3.6	16.2	2.6	1.36	17.35	2.02	20.13	5.809	6.533	8.43	3.959	7.841	5.734	15.426	501.75	2.27	11.2	1.806	60.25	51.75	8.25	7.9	32.25	21.5	3.75	43.5	2.27	23.1	1.63	2.55	68	19	27.9	5.5	4.1	4.4	90.1	6.3	1.81842
CVL_15	24	6.6	3	9.6	28.78	9.11	3	12.11	51	25.5	8.63	34.13	2.1	1.96	14.15	2.92	7.83	3.559	3.612	5.719	2.902	5.149	4.847	11.41	454.75	1.45	13.39	2.583	65	39	22.5	15.9	42.75	45.23	7.25	54.25	1.45	23.2	0.85	0.37	94	0	0	6.6	1.3	1.3	98.4	7.2	1.80131
CVL_150	18.9	5.8	1.9	7.7	19.9	5.7	1.9	7.6	24	6.2	2	8.2	2.6	1.42	14.61	3.86	36.35	4.853	5.341	6.589	4.099	7.124	6.503	16.379	462	2.21	13.38	1.885	58.75	55.25	3	8	27.75	30.53	3	33.75	2.21	24.6	1.48	2.68	99.99	47	47	8.7	4.9	4.9	99.7	7.7	1.8235
CVL_151	23.4	8.4	2.7	11.1	25	7.6	2.5	10.1	38.1	12.9	4	16.9	1.9	1.33	14.82	1.78	19.61	5.327	5.333	7.637	4.092	7.319	5.633	16.046	492.75	2.45	13.17	2.219	56.5	50.5	5.75	7.6	43.25	35.7	3.25	32.25	2.45	19	1.71	3.17	83	37	44.6	6	4.7	4.9	99.3	7.5	1.85259
CVL_152	21.9	6	2.5	8.5	23.8	6.1	2.3	8.4	36	11.22	4	15.22	1.7	1.93	12.19	2.2	20.91	5.416	6.062	7.587	4.731	7.4	7.527	14.928	476.75	1.97	13.95	2.5	63	48.5	12.5	9.3	39.75	37.2	3.5	39	1.97	22.9	2.78	4.91	84	0.01	0	6	1.3	1.3	88	6.2	2.03677
CVL_153	21.71	6.29	2.43	8.71	23.9	6	3	9	43.13	18.63	7.13	25.75	2.3	1.18	9.69	1.99	10.3	4.478	6.188	6.653	4.537	6.415	6.738	14.738	485.25	2.27	12.82	1.802	64.75	59.75	4.75	8.7	40.5	26.28	4.25	44.5	2.27	17.9	1.86	2.74	99.99	48	48	8.7	4.9	4.9	97.9	7	1.90065
CVL_154	18.2	4.8	2.5	7.3	19.3	4.8	1.9	6.7	22.9	5.6	2.6	8.2	2.8	1.23	14.62	2.2	21.3	4.851	8.394	6.126	5.793	6.6	6.954	16.388	513.75	3.17	12.72	1.938	48.25	45	3.25	7.7	25.25	29.67	3.75	29.33	3.17	20.8	2.02	3.85	99.99	96	96	8.7	6.8	6.8	100	8.7	1.99879
CVL_155	24.2	7.9	3.4	11.3	34.1	15.9	5.6	21.5	71.75	40.33	8	48.38	2.9	1.33	12.85	1.08	0	2.656	4.201	5.396	3.758	3.784	4.62	13.213	479	1.93	11.57	2.104	49.5	47.5	1.25	27.7	41	23.8	10.75	45.25	1.93	24.2	0.25	0.19	82	0.01	0	5.9	1.3	1.3	85.6	6.1	1.56701
CVL_156	20.89	6	2.22	8.22	21.3	5.1	2.1	7.2	25.6	6.8	3	9.8	3.2	1.03	10.24	2.13	12	4.537	4.291	6.578	3.494	6.211	5.262	11.672	521.5	3.48	7.1	2.083	50	13	36.5	7.2	21.25	24	3.75	58.25	3.48	17.2	2.07	2.72	99.99	76	76	8.7	5.7	5.7	99.5	7.6	2.0025
CVL_157	20.2	5.8	2.2	8	21.7	5.5	2.2	7.7	26	6.67	2.56	9.22	3.4	1.36	14.89	2.66	10.48	4.511	6.35	5.942	4.718	6.412	7.342	15.556	534.5	2.88	15.07	1.903	47.5	35.25	11.75	7.7	33.5	29.38	5.17	32.25	2.88	26.8	0.38	0.2	96	18	18.8	6.8	4.1	4.1	95.9	6.7	2.01856
CVL_158	18.44	4.78	2.11	6.89	21	5.75	2.88	8.63	24.8	6	3.2	9.2	3.6	1.25	16.07	1.89	17.91	6.609	8.409	10.225	4.713	8.72	7.915	14.118	546	3.73	8.8	1.906	49.25	26.5	22.75	8.8	25.75	26.65	4.25	58.25	3.73	18.1	1.56	3.72	99	97	98	7.3	6.9	7	100	8.7	1.67345
CVL_159	21.9	5.5	1.6	7.1	25.78	6	2	8	42	16	3.8	19.8	2.5	1.41	12.02	2.25	18.48	4.845	6.176	6.492	5.481	7.431	8.749	15.449	503.25	2.57	15.33	2.073	64.5	57.5	4	8.3	37.25	40.33	3.75	35.33	2.57	15.7	4.5	4.32	81	14	17.3	5.9	3.9	4.1	76.3	5.7	1.88585
CVL_16	21.75	6.38	1.88	8.25	24.3	6.3	2	8.3	26.7	7	1.9	8.9	3	1.05	9.99	2.47	13.48	5.718	8.405	10.177	5.652	7.814	9.196	15.56	553.25	3.57	14.35	2.021	46.5	40.5	5	7.22	33.25	28.88	4	26.75	3.57	20.6	1.26	0.32	100	52	52	8.7	5.1	5.1	99.6	7.7	2.28116
CVL_160	20.56	5	2	7	24.5	6.3	2.7	9	42.22	16.78	4.67	21.44	3.1	0.83	8.04	1.8	14.17	5.264	6.684	8.02	5.471	7.698	10.125	15.573	546	3.61	12.91	1.833	55	44	10	9.5	39.5	23.25	6.5	37.5	3.61	20.4	1.14	0.23	99.99	47	47	8.7	4.9	4.9	99.6	7.6	2.51584
CVL_161	25.7	7.6	2.1	9.7	26.9	7.5	2	9.5	51.5	24.5	4.63	29.13	2.6	1.08	8.44	1.91	13.83	4.231	5.582	7.462	5.268	6.271	7.629	14.237	491.5	2.22	13.83	2.365	60.25	44.75	15.5	10	41.25	38.65	4.25	40.75	2.22	24.2	1.52	2.42	97	3	3.1	6.9	3.1	3.1	99	7.3	2.38189
CVL_162	19.8	4.9	1.9	6.8	21.2	5.4	1.9	7.3	24	5.5	2.9	8.4	3.1	0.88	9.77	2.36	16.87	4.037	5.093	5.946	3.858	5.378	4.012	14.139	516	2.56	9.77	1.823	51	42.75	5.75	7.8	20.5	15.15	4	33.33	2.56	22	0.79	0.36	99.99	11	11	8.7	3.8	3.8	99.6	7.7	2.1868
CVL_163	18.2	4.9	1.4	6.3	20.3	5.4	1.5	6.9	22.44	4.67	1.56	6.22	3	0.91	8.85	1.46	9.48	6.245	8.214	7.723	5.325	8.29	7.809	15.621	545.75	3.21	7.35	1.615	38.75	22.75	15.75	6.7	24.25	16	4.5	27.5	3.21	17	2.63	4	99	78	78.8	7.3	5.8	5.8	98.9	7.3	1.92196
CVL_164	22.5	6.2	3	9.2	25.3	7.4	3	10.4	46.1	21	6	27	2	1.41	10.61	2.01	22.83	5.054	4.526	7.848	4.573	7.68	7.937	14.771	506.25	2.67	17.11	2.115	62.25	55.25	6.25	10	46.25	47.25	3.25	46.75	2.67	18.7	2.38	0.67	66	19	28.8	5.4	4.1	4.4	61.4	5.3	1.86705
CVL_165	18	4.3	2.5	6.8	19.3	5	2.2	7.2	22.43	5.29	2.29	7.57	2.1	1.18	14.53	1.48	22.09	6.439	8.098	8.926	4.743	7.164	7.909	15.223	529.75	3.07	9.62	1.531	41.25	32	8	7	19.75	15.5	3.75	26.75	3.07	22	1.6	2.58	92	66	71.7	6.4	5.4	5.6	98.1	7.1	1.81263
CVL_166	17.38	4.38	1.5	5.88	19.89	4.67	1.78	6.44	21.1	4.6	2.3	6.9	2.8	1.27	14.43	2.85	18.52	5.363	4.898	8.308	4.081	6.733	6.036	14.712	483.25	2.64	8.76	1.563	45.5	33.75	11	6.6	22.25	24.13	3.5	35.25	2.64	19.1	1.29	2.71	98	62	63.3	7.1	5.3	5.3	99.3	7.4	1.60146
CVL_167	17.1	4.7	1.7	6.4	18.9	4.8	1.5	6.3	21.57	5	1.43	6.43	2.2	1.41	14.85	2.54	19.09	5.852	5.039	5.782	3.741	6.949	4.567	13.369	501	3.09	8.94	1.875	42.25	32	8.75	6.5	20.25	19.13	3.75	38.75	3.09	17.7	2.26	5.18	99.99	73	73	8.7	5.6	5.6	100	8.7	1.67304
CVL_168	20.2	5.6	2.3	7.9	23.67	7.33	2.78	10.11	36.2	12.9	5.9	18.8	3.3	1.43	14.96	2.9	16.78	4.908	7.741	7.994	4.949	6.584	6.865	16.602	536	3.34	14.53	2.167	61	40	20.25	11.4	42	36.88	5	47	3.34	22.1	0.98	0.52	99.99	16	16	8.7	4	4	98.4	7.2	2.4414
CVL_169	20.8	6.7	2.6	9.3	23.11	6.78	2.89	9.67	46.2	22.5	6.6	29.1	2.6	1.16	13.91	2.38	18	4.001	4.453	4.647	3.435	5.351	5.11	12.166	496	2.33	12.24	1.74	56.75	51.25	5.5	9	38	26.88	4.25	44.75	2.33	19.8	1.17	0.99	91	0.01	0	6.3	1.3	1.3	99.4	7.5	1.80616
CVL_17	23.1	7.1	2.3	9.4	25	7	2.4	9.4	41.33	18.22	4.11	22.33	2.8	0.99	9.66	1.98	8.04	2.854	5.819	7.383	4.798	4.473	6.472	13.239	530.25	2.43	16.2	NA	68	65.75	2	9.2	NA	42.73	4	37.5	2.43	15.8	1.99	2.54	94	16	17	6.6	4	4	97	6.9	1.15342
CVL_170	25.5	9.1	3	12.1	26	8.8	2.9	11.7	49.5	21.67	6.33	28	2.2	1.06	10.02	2.26	12.39	2.672	3.485	4.96	3.175	4.383	5.162	12.501	467.25	2.01	10.23	1.917	59.75	53.25	6	10.4	36.5	20.25	4.5	40.5	2.01	22.1	1.01	0.51	98	12	12.2	7.1	3.8	3.8	98.4	7.2	1.81996
CVL_171	19.1	6.2	2.3	8.5	20.8	5.5	1.8	7.3	23.8	5.6	2.9	8.5	2.6	1.38	15.68	1.76	9.83	4.598	5.25	7.347	3.707	5.97	5.327	13.087	534.75	3.28	8.32	1.938	37	25.5	11	7.4	21.25	16.4	4.25	45.75	3.28	20.6	0.94	0.5	99.99	89	89	8.7	6.2	6.2	99.5	7.6	2.06785
CVL_172	22.78	7.67	2.44	10.11	24.4	7.4	2.7	10.1	30.22	9.56	3.11	12.67	2.8	0.96	10.51	1.57	14.35	5.9	7.376	8.381	4.037	7.788	6.585	15.167	486	2.35	13.28	2.104	61	59.75	1.25	10.2	38.25	38.5	3.75	40.5	2.35	15.4	1.75	5.38	99.99	62	62	8.7	5.3	5.3	98.6	7.2	2.05444
CVL_173	19.56	5.11	2.11	7.22	21.7	5.8	1.8	7.6	26	6.8	2.2	9	3.2	1.04	11.34	1.55	9	6.454	6.044	8.272	4.673	8.206	8.612	15.472	495.25	3.12	14.13	1.802	53.5	46.25	6.75	7.7	28.75	31.83	2.5	26	3.12	19.9	1.98	2.9	99.99	15	15	8.7	4	4	99.5	7.6	2.18442
CVL_174	22.13	5.88	2.25	8.13	28.33	9	2.67	11.67	40.88	13.13	5	18.13	3	0.97	11.55	1.78	9.35	3.558	4.91	5.908	4.129	5.1	5.13	13.117	517.25	2.51	9.19	2.083	44.75	30	11.5	16.56	39.75	27.05	7.25	54.5	2.51	22.7	1.27	0.89	98	32	32.7	7.1	4.5	4.6	98.4	7.1	2.19509
CVL_175	20.4	4.7	2.1	6.8	21.2	4.9	2	6.9	23.5	4.8	2	6.8	3.4	0.85	9.61	1.59	10.17	5.838	6.427	9.96	4.696	7.168	7.606	17.344	513.75	2.58	13.83	1.917	60.75	58.25	2.25	7.2	28.5	37.15	3.75	32.25	2.58	16.7	2.44	4.2	53	39	73.6	5.1	4.7	5.6	100	8.7	1.79691
CVL_176	18.6	5.7	2	7.7	20.3	5.6	1.8	7.4	22.6	4.9	2.4	7.3	2.8	1.39	18.91	2.82	22.17	5.083	5.173	6.913	3.825	6.197	4.149	15.065	489.5	2.54	8.89	1.792	46.75	33	12.75	7.5	22	15.8	3.75	32.25	2.54	19.6	1.28	3.48	99.99	95	95	8.7	6.6	6.6	100	8.7	1.52003
CVL_177	22.6	6.7	2	8.7	23.4	7	1.4	8.4	28.5	6.6	1.8	8.4	2.8	1	11.89	1.76	12.65	4.217	5.054	7.076	3.686	6.371	5.021	14.177	510.25	2.46	17.29	2.208	61.5	54.75	6.25	9	48.75	34.9	4.5	36.25	2.46	17.1	2.15	4.52	98	14	14.3	7.1	3.9	3.9	99.6	7.7	2.38418
CVL_178	23.5	6.9	2.4	9.3	31.8	13.5	3.4	16.9	52.5	32.63	9.13	41.75	2.3	1.15	15.68	3.42	21.26	4.205	5.138	6.28	3.333	5.099	5.128	13.01	454	2.07	9.23	2.083	58.33	37	17.67	19.6	35	21	6	44.33	2.07	20.7	1.16	4.07	99	26	26.3	7.3	4.4	4.4	100	8.7	2.01588
CVL_179	24.1	8.7	2.6	11.3	26.78	9.56	2	11.56	44.22	21.44	8.11	29.56	2.8	1.13	11.28	2.02	10.83	4.944	5.695	7.395	4.602	6.519	5.883	12.42	510.25	2.23	12.86	1.885	64.5	61	3.25	10.9	39	30.08	3.75	56.75	2.23	19.8	2.66	3.3	70	31	44.3	5.5	4.5	4.9	86.9	6.1	2.02234
CVL_18	23.33	6.67	2.89	9.56	25.3	7.3	3.6	10.9	48.3	19.5	8.5	28	2.8	1.17	10.42	1.85	4.61	3.853	5.344	5.7	3.944	4.559	5.186	12.643	517.5	2.55	12.07	1.708	56	53	1.75	8.67	37	24.05	4	42.5	2.55	13.8	1.59	3.06	98	5	5.1	7.1	3.4	3.4	99.6	7.6	2.14195
CVL_180	22	6.44	2.11	8.56	23.8	6.4	2.5	8.9	29.1	8.1	2.7	10.8	2.7	1.15	9.06	1.86	15.78	5.768	5.906	9.532	4.85	6.362	6.052	12.871	471.25	2.09	10.84	1.771	59.25	52.25	4	9	34.5	24.03	4.25	47.25	2.09	23.4	1.59	2.31	99	19	19.2	7.3	4.1	4.1	98.4	7.1	1.71687
CVL_182	22.1	6.3	2.6	8.9	27.8	10.2	3.1	13.3	50	25.75	7.63	33.38	3.3	0.74	7.61	2.72	10.65	3.631	4.717	5.732	4.2	5.307	7.608	14.392	514.75	2.42	14.22	2.385	50.25	42.5	7.25	18.6	37.5	51.45	6	43.25	2.42	20.9	0.95	0.47	99.99	44	44	8.7	4.8	4.8	97.9	7	1.95044
CVL_183	20.6	5.7	2.4	8.1	22.7	5.7	2.6	8.3	27.2	7.5	3.7	11.2	3.2	0.98	11.38	1.99	12.74	4.356	4.789	5.601	4.152	5.549	4.554	14.497	528	2.78	10.29	2.052	45.5	26.5	16.5	8.9	28	20.15	5	45.5	2.78	16.9	0.96	0.54	98	13	13.3	7.1	3.9	3.9	99.5	7.6	2.27573
CVL_184	17.6	4.4	1.5	5.9	20.4	4.3	1.4	5.7	21.9	4	1.4	5.4	3.1	0.91	11.07	1.86	11.17	5.608	5.317	7.659	3.516	7.423	5.629	14.794	537.75	3.06	9.1	1.688	41.75	34	7.25	6.1	29.5	12.58	4.25	19.75	3.06	14.3	1.62	3.02	99	69	69.7	7.3	5.5	5.5	100	8.7	2.32892
CVL_185	19.89	5.89	1.78	7.67	21.9	5.5	1.8	7.3	25.3	5	2.7	7.7	NA	NA	NA	1.9	9.57	4.666	6.761	7.14	4.428	6.838	6.788	15.158	574.5	NA	3.88	2.083	42	1.25	40.75	7.4	24.75	25.38	4.5	43.75	NA	NA	NA	NA	NA	NA	NA	NA	NA	NA	NA	NA	2.47449
CVL_186	26.6	9.6	2.6	12.2	27.3	8.6	2.2	10.8	42.8	16.7	5.4	22.1	3.4	0.95	9.81	1.61	11.43	6.635	7.688	9.514	6.277	8.135	8.575	17.547	545.25	2.81	15.22	2.292	59.5	46.75	12.25	10.9	51.75	48.25	3.75	47.25	2.81	14.9	1.03	0.33	76	43	56.6	5.7	4.8	5.2	100	8.7	2.67526
CVL_187	26.2	9.8	4	13.8	31	13.8	5.6	19.4	57.5	31.83	9.5	41.33	2.9	1.53	18.07	1.95	11	4.438	4.684	6.311	2.564	5.449	3.883	11.721	466	1.83	11.03	1.938	51.75	50.25	1.5	28.8	41.25	26.25	9.25	55	1.83	15	1	3.04	58	10	17.2	5.2	3.7	4.1	99.6	7.7	2.20735
CVL_188	23.9	8.3	3.4	11.7	38.11	21	6.22	27.22	70.33	37.5	7.63	45.13	3.2	1.26	12.82	1.72	1.48	3.532	4.661	6.419	4.195	5.043	6.1	12.665	471.5	1.86	10.86	2.156	47.75	47	0.5	29.89	41	25.55	8.75	48.25	1.86	20.9	0.8	0.62	90	1	1.1	6.3	2.7	2.7	99.5	7.6	1.91392
CVL_189	17.8	4.6	1.7	6.3	20.9	4.6	1.7	6.3	23.57	5.57	2.14	7.71	2.6	1.05	12	1.6	11.96	6.923	6.506	8.785	4.722	8.083	6.449	15.698	516.75	2.73	10.51	1.771	49.25	45.25	3.5	7.78	24.67	20.45	3.25	36.5	2.73	20.9	2.32	3.77	99	87	87.9	7.3	6.1	6.2	99.5	7.5	2.18779
CVL_19	21.8	6.6	2.5	9.1	27.2	9	3	12	50.5	22.25	7.38	29.63	2.6	1	12.06	2.78	4.48	3.306	4.629	5.594	3.446	4.322	5.079	13.302	475.75	2.51	10.8	1.927	56.75	47.5	8.5	15.3	45.5	36.38	4.75	59.25	2.51	14.2	1.69	2.77	99	23	23.2	7.3	4.3	4.3	99.7	7.7	2.03783
CVL_190	18.9	4.6	1.9	6.5	21.5	5.2	1.9	7.1	25	6.1	1.9	8	3	1.03	9.98	2.14	16.91	6.765	8.46	7.978	5.727	9.083	9.917	16.764	537.25	3.54	13.46	1.885	48.75	43.75	4.25	6.9	25	27.98	3	23.25	3.54	19.7	1.51	0.84	98	37	37.8	7.1	4.7	4.7	99.1	7.4	2.05217
CVL_191	18.5	5.4	1.8	7.2	21	5.67	1.89	7.56	23.6	5.3	1.9	7.2	2.7	0.87	10.46	1.73	11.48	4.783	6.458	7.266	4.758	5.355	4.549	14.015	531.25	2.8	9.88	1.74	52.25	45.75	4.75	7.7	20.5	20.23	3.75	35.25	2.8	16.8	2.4	4.56	99	94	94.9	7.3	6.6	6.6	99.7	7.7	1.8411
CVL_192	18.5	4.9	2	6.9	22.22	5.33	1.67	7	23.4	5.2	2.3	7.5	2.3	1.14	12.78	2.63	16.52	6.316	7.418	8.33	4.558	7.674	7.709	16.334	541	3.02	13.19	2.042	58	46.5	10.5	6.4	29	31.33	3.75	35	3.02	18.5	2.08	3.73	84	68	81	6	5.5	5.9	100	8.7	1.80606
CVL_193	19.1	4.8	2.1	6.9	20.7	4.6	2.1	6.7	26.2	5	2.2	7.2	3.1	1.09	10.66	1.76	9.91	4.261	4.925	6.38	4.562	5.044	6.207	14.463	482.25	2.37	8.71	1.865	45.5	21.75	20.75	6.6	22	17.75	3.5	30.25	2.37	20.4	2.18	3.01	99.99	18	18	8.7	4.1	4.1	98	7.1	1.58321
CVL_20	25.2	8.9	2.2	11.1	26.6	9.5	2.5	12	53.6	26.4	9.2	35.6	2.2	1.37	12.63	2.37	12.43	4.923	7.392	10.765	6.387	6.918	7.619	14.289	515.75	2.53	14.71	NA	75.75	66.75	8.5	10.6	42	40.38	3.25	40.5	2.53	21.9	0.95	0.39	100	48	48	8.7	4.9	4.9	99	7.3	1.92411
CVL_21	20.7	5.8	2	7.8	29.5	11.1	3.4	14.5	56.4	32.6	8.2	40.8	2.9	1.05	10.31	2.52	7	3.559	5.318	4.599	4.277	5.356	6.007	13.694	545.5	2.85	11.1	2.177	47	31.5	14.25	19.1	47	26.58	6.25	52.75	2.85	16.9	1.53	0.65	94	1	1.1	6.6	2.7	2.7	99.4	7.5	2.60115
CVL_22	21.7	6.6	2.9	9.5	23.9	6.8	3.1	9.9	41.67	17.89	7.11	25	2.9	0.98	11.34	2.08	6	4.308	6.067	7.565	3.887	6.164	6.679	14.526	517	2.37	14.11	1.938	56.75	53	3.25	8.1	39.25	24	4.25	43.5	2.37	13.6	1.61	1.75	82	0	0	5.9	1.3	1.3	98.5	7.2	1.75541
CVL_23	17.4	5	1.5	6.5	20.9	5.3	1.8	7.1	24.8	6.9	2.5	9.4	2.7	0.93	10.9	2.28	5.91	4.539	4.247	6.264	3.603	5.106	5.729	15.476	552.5	3.36	8.12	1.889	35	22.75	11.5	7.1	20.25	17.38	4.25	31.75	3.36	15.9	1.22	0.99	99.99	31	31	8.7	4.5	4.5	99.5	7.6	2.01837
CVL_24	27	8.6	2.2	10.8	44.83	25.17	7	32.17	71.88	41	14.63	55.63	3	1.21	12.71	2.92	6.26	4.876	7.355	10.03	6.028	7.83	7.161	17.784	521.5	2.44	15.91	2.354	55.25	54.25	0.75	31	46	33.4	10	42	2.44	14.2	1.19	2.2	81	0	0	5.9	1.3	1.3	98.3	7.1	2.39574
CVL_25	18	4.8	1.6	6.4	19.6	5.1	1.7	6.8	23.67	5.33	1.83	7.17	3.2	1.16	15.32	3.07	10.57	6.992	7.338	11.051	5.095	10.256	9.348	17.773	531.25	3.04	13.59	1.917	51.5	46.25	5.25	7.2	27.25	30.4	3.25	26.5	3.04	17.5	1.27	2.51	100	77	77	8.7	5.7	5.7	100	8.7	1.73855
CVL_26	20	6	2.4	8.4	21.2	5.3	2.3	7.6	29	8	3.89	11.89	2.8	1.5	15.99	3.16	11.09	4.55	5.461	7.169	4.476	5.469	5.943	15.515	516.5	2.65	13.24	1.938	51.5	41.25	8	7.44	27.5	27.25	4	34.5	2.65	21.7	0.89	0.35	99	31	31.3	7.3	4.5	4.5	100	8.7	1.97248
CVL_27	27.1	13	3.9	16.9	32.9	18.6	4.8	23.4	62.75	43.63	9.25	52.88	2.8	1.32	15.59	2.93	8.87	5.18	5.46	6.951	4.913	6.726	5.906	14.499	505	2.75	11.4	1.865	53	46.25	4	32.6	47.25	24.8	8.5	62.75	2.75	16.7	0.53	0.24	99	39	39.4	7.3	4.7	4.7	99.7	7.8	1.98664
CVL_28	17.7	4.2	2	6.2	20.5	4.8	1.9	6.7	26.1	6.4	2.9	9.3	3.1	0.89	11.26	2.59	6.26	5.138	6.385	7.505	4.591	6.232	6.02	13.667	546.25	3.17	8.28	1.594	37.75	27.25	10	6.7	22.75	20.78	3.75	31.25	3.17	16.8	2.11	3.54	99	84	84.8	7.3	6	6	100	8.7	1.8144
CVL_29	19.1	5.1	2.5	7.6	26.1	8	2.8	10.8	39.7	16.2	5.7	21.9	2.6	1.15	16.57	2.56	11.35	4.266	4.93	6.188	3.461	5.377	5.95	13.696	523	2.56	11.35	1.896	52	40.5	8.5	12.9	42.5	25.1	5.75	56	2.56	16.8	2.36	4.6	93	20	21.5	6.5	4.2	4.2	100	8.7	2.10636
CVL_3	23.1	6.8	2.5	9.3	25.33	6.89	2.89	9.78	39.43	15.14	6.29	21.43	2.9	1.93	11.4	2.5	6.61	NA	NA	NA	NA	NA	NA	NA	438.75	1.62	9.18	1.969	59.5	29	26.75	9.33	29.5	19.63	6	47.75	1.62	19.9	2.1	2.93	92	3	3.3	6.4	3.1	3.2	98.5	7.2	1.68729
CVL_30	19.7	5.7	2.2	7.9	20.6	5.9	2.2	8.1	25.5	7.2	2.9	10.1	3.1	1.25	17.03	4.26	18.87	3.452	5.726	8.85	4.832	5.064	5.327	13.762	509.64	2.97	7.94	2.042	40.75	23	16.75	8.3	23.5	19.13	4.5	43.5	2.97	21.5	0.68	0.19	99	76	76.8	7.3	5.7	5.7	99.3	7.5	2.09313
CVL_31	24.3	6.7	2.8	9.5	36	14	4.7	18.7	66.88	37	8.5	44	2.7	1.19	12.46	2.48	7.57	4.228	5.639	7.347	4.779	6.669	7.717	16.256	539.75	2.95	13.12	2.208	52.25	36	15	25.9	56	46.6	6.5	59	2.95	19.8	1	0.34	94	0	0	6.6	1.3	1.3	96.5	6.8	2.48936
CVL_32	22.33	5.89	2.11	8	26.7	7.3	3	10.3	43.22	16.33	6	22.33	2.8	0.91	11.15	1.96	9.35	4.306	4.519	6.742	3.455	5.079	4.653	13.469	507	2.61	11.97	1.729	54	49.25	2.5	8.7	40.75	27.5	4.25	51.5	2.61	14	2.15	3.88	99	31	31.3	7.3	4.5	4.5	100	8.7	2.151
CVL_33	18.3	5	1.9	6.9	18.9	5.2	1.2	6.4	23	4.5	2.1	6.6	2.8	1.34	13.96	2.86	8.83	5.031	4.898	8.432	4.111	6.713	5.784	13.439	505.5	2.63	10.95	1.906	43.5	32.25	8.25	6.4	19.75	29.63	3.5	34.25	2.63	21.5	1.53	3.27	100	42	42	8.7	4.8	4.8	95	6.6	1.49785
CVL_34	24.1	8.7	3.5	12.2	26.5	8.6	3.5	12.1	45.33	23.56	6.89	30.44	2.8	0.85	11.31	1.69	4.09	3.556	6.748	8.395	5.403	5.823	9.261	14.751	529.5	2.36	19.32	2.365	79.25	74.25	4.75	10.5	47.75	43.13	3.25	47.75	2.36	18	4.26	4.61	100	38	38	8.7	4.7	4.7	98.5	7.2	1.8995
CVL_35	20.4	5.5	2.8	8.3	20.8	5.4	2.6	8	25.33	6.89	2.89	9.78	3.1	1.19	11.2	1.96	6.35	3.687	5.128	8	3.969	5.347	5.146	15.2	551.25	2.85	7.62	1.635	41.25	19	19.75	8	22.75	17.4	4.75	33.25	2.85	20.6	0.62	0.05	82	63	76.8	5.9	5.3	5.7	98.6	7.2	2.08089
CVL_36	18.6	4.4	2	6.4	20.3	5.2	1.8	7	23.3	4.8	1.8	6.6	3.3	1.32	17.37	4.5	16.48	5.29	5.775	7.934	4.824	5.925	5.16	14.674	492.5	2.61	7.81	1.479	46	31.5	13.25	7.1	19.75	17.5	4	37	2.61	27.4	0.7	0.13	100	92	92	8.7	6.4	6.4	100	8.7	1.50177
CVL_37	20.2	5.3	1.8	7.1	24.6	7.1	2.1	9.2	39.1	15.5	4.3	19.8	2.9	0.93	9.11	1.67	3.91	3.63	4.652	6.824	5.308	5.144	8.849	15.649	610.5	3.25	20.06	2.458	63.25	54	8.75	11.1	51.25	40	4.25	39	3.25	21.5	1.14	2.6	93	0	0	6.5	1.3	1.3	88.5	6.2	2.30967
CVL_38	24.4	7.7	2.6	10.3	31.3	13.2	3.7	16.9	58.6	32.5	8.6	41.1	2.5	1.45	11.78	3.17	11.78	4.342	4.425	9.323	3.913	6.578	6.181	13.571	461.75	1.5	13.45	2.74	56.75	43.75	2.5	23.1	47.25	43.43	8.25	67.25	1.5	24.2	1.77	3.32	99	1	1	7.3	2.7	2.7	93.2	6.5	1.72377
CVL_39	22.8	6.7	2.5	9.2	24.7	7.7	2.7	10.4	45.33	21.11	5.89	27	2.7	0.97	9.16	2.24	10.61	5.335	5.641	7.208	4.36	6.063	6.973	15.727	494.25	2.02	15.58	2.073	72.75	71	1.25	10.8	43	55.88	4.25	50.25	2.02	18.3	1.65	3.06	88	0	0	6.2	1.3	1.3	99.6	7.6	1.84474
CVL_4	18.22	4	1.67	5.67	19.3	4	1.7	5.7	22.3	4.1	2.2	6.3	3.2	1.02	10.09	1.64	2.87	3.342	4.339	5.666	3.413	4.524	7.334	14.278	590.5	3.19	9.74	1.646	35.75	26.75	7.5	5.9	18.75	14.75	3.75	21.75	3.19	17	0.91	0.37	98	90	91.8	7.1	6.3	6.4	99	7.3	1.82049
CVL_40	23.4	7.4	3	10.4	25.2	8	3	11	48.2	23.3	4.7	28	3	0.93	10.47	2.05	5.04	3.738	5.007	5.354	3.816	4.407	5.18	13.284	491.5	2.28	9.11	1.764	54.25	46	8	10.78	34	20.33	5	42.5	2.28	16.1	1.09	2.17	100	35	35	8.7	4.6	4.6	99.1	7.4	2.00665
CVL_41	18.6	4.6	1.9	6.5	20.8	5.5	1.6	7.1	24.5	7.1	2.2	9.3	3.3	0.91	10.22	2.06	9.22	5.906	8.213	10.594	7.034	8.334	11.39	16.98	566.75	3.52	14.11	2.177	47.75	30.25	16.75	6.9	31	35.6	3.5	29.25	3.52	18.5	2.17	2.41	99	35	35.4	7.3	4.6	4.6	98.5	7.2	2.33016
CVL_42	18.44	5	1.89	6.89	20.8	5.4	2	7.4	25.5	6.13	2.63	8.75	3.1	1.05	11.38	1.95	5.74	6.564	7.832	10.207	5.62	7.851	7.013	14.93	556.67	3.19	10.81	1.688	47.5	45	1.5	7.6	25.75	24.07	4.67	36.33	3.19	17.4	2.36	3.15	100	91	91	8.7	6.3	6.3	99.7	7.8	1.64156
CVL_43	22	6.3	2.6	8.9	23.3	5.9	2.6	8.5	37.7	11.7	5.2	16.9	2.5	1.68	18.11	2.58	7.3	5.817	7.401	10.164	5.136	7.985	6.51	14.139	504	2.54	13.2	2.104	55.5	44.5	8.75	7.5	40.75	31.1	3.75	30	2.54	21.1	0.93	0.13	100	10	10	8.7	3.7	3.7	97.9	7	1.96497
CVL_44	21.33	6.33	2.44	8.78	22.1	5.5	2.1	7.6	29.63	6.63	2.75	9.38	3.1	1.33	17.76	2.29	7.13	5.527	7.163	9.098	4.981	7.108	6.88	13.371	501.25	2.42	13.09	1.729	52.75	48.25	3.25	7.7	33.75	28.65	3.5	31.5	2.42	18.1	2.12	3.52	NA	NA	NA	NA	NA	NA	96	6.8	1.67362
CVL_45	25.7	7.4	2.4	9.8	25.86	7.14	2.29	9.43	45.5	16.83	4.67	21.5	2.5	2.42	11.94	1.76	9.74	3.179	3.965	6.296	3.943	4.678	6.167	12.146	486.75	2.05	14.34	NA	66.5	49.5	8.75	8.7	37.75	29	4	38.5	2.05	19.3	2.55	2.83	94	1	1.1	6.6	2.7	2.7	87.4	6.1	1.82951
CVL_46	25.3	8.1	3.5	11.6	34.7	16.6	5.7	22.3	66.5	37.13	10.38	47.5	3.2	1.72	17.18	2.75	6.04	3.126	4.928	7.327	3.548	4.404	6.003	13.229	487	2	12.62	2.188	56.75	47.25	5.5	32.6	43.25	31.3	10.5	49.75	2	27.3	1.17	0.18	97	10	10.3	6.9	3.7	3.7	92.9	6.5	2.11069
CVL_47	20.57	5.57	2	7.57	21.3	5	1.7	6.7	37.44	13.22	4.44	17.67	3	1.39	11.37	1.77	5.83	3.376	4.251	4.81	3.996	4.762	7.321	13.326	489.5	2.05	15.6	NA	65.5	53.75	11.5	6.8	35.75	31.88	3.5	26	2.05	18.3	1.57	2.34	98	0.01	0	7.1	1.3	1.3	99.6	7.7	2.37308
CVL_48	19.5	5.7	2.4	8.1	20.67	5.22	2.33	7.56	24.7	5.3	2.8	8.1	2.6	1.22	12.31	1.78	5.52	3.466	4.379	4.87	3.62	4.774	5.534	14.357	501	2.47	12.62	1.885	56.75	43.75	12	7.1	25.25	34.48	4.5	38.25	2.47	17.7	1.35	2.06	98	2	2	7.1	2.9	3	100	8.7	2.78856
CVL_49	25.2	7.6	2.9	10.5	34.33	13.67	4	17.67	72.25	40.5	14.57	53.57	3	2.09	14.49	2.98	26.87	3.693	5.469	8.267	4.666	6.855	6.945	14.873	515.5	2.16	16.77	2.375	57.25	50.25	6	21.8	52	38.3	8.25	44.75	2.16	19.5	4.15	2.92	90	2	2.2	6.3	2.9	3	84.5	6	1.88671
CVL_5	NA	NA	NA	NA	NA	NA	NA	NA	76	44.5	8.6	52.75	NA	NA	NA	2.25	5.04	2.804	4.381	6.041	3.67	4.581	5.952	12.665	520.75	2.11	11.59	1.948	46.75	38	7.25	36.4	44.25	33.58	10.75	55.5	2.11	13.8	1.67	3.04	90	0	0	6.3	1.3	1.3	NA	NA	1.87541
CVL_50	19.1	5.9	2.1	8	20.2	5.5	1.8	7.3	22.44	4.75	1.38	6.13	2.9	1.55	16.86	3.23	19.43	4.528	6.336	8.744	5.267	6.59	5.865	15.686	548.25	2.89	13.08	2.444	58.75	28.75	29.5	7.2	26	28.2	3.75	27.5	2.89	18	2.79	4.02	100	82	82	8.7	5.9	5.9	100	8.7	1.9116
CVL_51	20.6	5.7	2.3	8	27.9	10.1	3.8	13.9	47.8	26.8	7.2	34	2.7	1.07	11.36	1.52	4.87	3.727	4.675	4.74	2.461	4.616	4.664	13.276	508.5	2.31	9.07	2.063	54.25	32.5	21.5	19.6	43	23.98	7	53.75	2.31	14.1	1.63	2.95	98	41	41.8	7.1	4.8	4.8	98.5	7.2	2.43462
CVL_53	16.9	4.4	1.9	6.3	19.2	4.5	1.9	6.4	21.8	4.2	2.6	6.8	2.3	0.95	12.15	NA	NA	4.6	5.038	5.465	3.871	6.413	7.219	14.573	552	3.27	10.22	1.646	45.5	41	4	6.7	20.25	26.73	3.75	37.75	3.27	15.4	2.08	3.04	99	78	78.8	7.3	5.8	5.8	100	8.7	2.31199
CVL_54	20.7	5.3	2.2	7.5	22.2	5.4	2	7.4	27.67	7.22	2.67	9.89	2.5	1.27	12.04	2.01	7.35	6.126	7.341	11.254	5.762	9.329	9.37	16.627	490	2.48	15.31	2.104	57.75	52	5.5	8	32.75	30.48	3.5	27	2.48	16.9	3.24	4.56	98	5	5.1	7.1	3.4	3.4	100	8.7	2.23225
CVL_55	21.3	5.2	2.5	7.7	25	6.3	2.7	9	40.9	19.3	5.5	24.8	3.1	1.11	9.78	2.01	7.48	5.875	7.16	9.291	6.108	8.394	9.511	16.648	543.25	2.74	17.83	2.177	67	62.75	4	10.9	46.5	47.05	3.75	45.5	2.74	14.2	1.86	2.42	100	12	12	8.7	3.8	3.8	98.6	7.2	2.35088
CVL_57	19.3	4.3	2.1	6.4	21.6	5.1	1.9	7	42.33	17.17	5.83	23	3.2	1.02	11.02	2.03	5.91	4.19	4.806	6.222	4.048	5.541	8.353	14.544	499.75	2.32	13.83	2.125	66	57.75	6.5	7.5	38	26.68	4.75	35.75	2.32	16.9	1.36	1.26	98	9	9.2	7.1	3.7	3.7	94.4	6.6	1.66207
CVL_58	22.8	5.7	2.3	8	24.1	5.7	2.4	8.1	42.67	16.78	4.44	21.22	2.3	1.24	12.09	1.63	NA	4.578	5.099	7.301	4.459	5.613	7.289	13.535	521.75	2.45	13.89	1.813	58.25	49.25	7.75	8.6	44.5	25	4.5	42.25	2.45	15.8	1.64	1.88	91	4	4.4	6.3	3.2	3.3	98.9	7.3	2.26307
CVL_59	23	7.11	2.78	9.89	25.4	7.6	2.5	10.1	46.11	24.44	7.67	32.11	2.8	1.24	14.61	3.01	25.61	5.608	7.177	9.917	5.045	7.048	8.286	14.907	509.75	2.1	12.84	1.979	61.75	56.25	5.25	8.5	42.5	23.98	3.75	44.75	2.1	17.4	2.11	2.56	86	48	55.8	6.1	4.9	5.1	94	6.6	1.8343
CVL_6	18.2	5	2.2	7.2	20.89	5.22	2.22	7.44	23.5	5.3	2.4	7.7	2.5	1.12	11.09	2.34	5.83	4.017	5.326	6.533	4.033	5.901	4.239	14.677	544	2.53	8.89	1.76	38.75	26	12	7.6	25.5	17.7	4	41.5	2.53	17.9	1.4	1.59	99	55	55.6	7.3	5.1	5.1	100	8.7	2.32274
CVL_60	19.9	4.9	1.7	6.6	27.8	10.2	2.8	13	44.2	20.7	5.9	26.6	3.1	0.85	10.48	1.65	4.74	3.85	5.168	6.355	4.63	5.578	5.683	13.79	534.75	2.86	9.18	2.021	44.25	29.5	12	18.6	41.75	22.93	6.5	50.25	2.86	17.2	0.82	0.6	100	69	69	8.7	5.5	5.5	100	8.7	2.98802
CVL_61	21.8	6.5	2.4	8.9	25.2	7.4	2.6	10	40.5	16.7	5.3	22	2.7	0.8	10.35	1.92	7.52	5.009	7.411	9.936	5.363	6.915	6.547	14.198	541.5	2.61	11.15	1.722	59.5	54.75	4.5	8	39	24.63	3.5	40.5	2.61	13.4	2.51	3.43	98	39	39.8	7.1	4.7	4.7	99.5	7.6	1.89059
CVL_62	32	14.2	3.9	18.1	44.6	24.6	6.3	30.9	78	39	8.71	47.57	2	1.17	10.35	2.43	6.13	3.052	4.085	6.425	4.09	5.334	5.558	12.695	481.25	1.9	13.8	2.146	52.75	43.5	8.5	32.9	52.75	25.77	8.75	35	1.9	19.4	1.16	0.48	93	6	6.5	6.5	3.4	3.5	88.9	6.2	2.24254
CVL_63	18.78	4.22	2.11	6.33	21	4.1	2.1	6.2	35	10.88	5.63	16.5	3.5	1.14	9	1.85	10.61	3.134	4.858	5.549	4.058	3.152	6.594	13.596	524.25	2.84	10.27	1.75	41	32.25	8.25	5.9	21.25	20.68	4	37.75	2.84	17.2	0.5	0.14	96	0	0	6.8	1.3	1.3	89.9	6.3	1.91873
CVL_64	19.8	5.3	2.2	7.5	20.4	5.2	1.9	7.1	24.8	6.4	2.5	8.9	3.6	0.89	9.6	2.39	9.65	3.956	5.281	7.547	5.461	5.771	8.215	15.543	498.75	3.08	14.28	1.917	57.75	51.5	4.25	7.4	21.5	30.65	3	31	3.08	15.3	3.09	3.35	98	30	0	7.1	4.5	1.3	99.1	7.3	2.06016
CVL_65	16.6	4.2	1.8	6	19	4.7	1.4	6.1	21.78	4.33	2.11	6.44	2.9	1.16	14.96	2.54	12.09	6.505	5.835	9.636	4.57	7.386	5.713	13.138	540.75	3.02	8.55	1.615	42.5	30.25	10.5	6.5	23	19	4.75	30.75	3.02	17.3	2.76	3.47	100	93	30.6	8.7	6.5	4.5	99.6	7.6	2.1706
CVL_66	23.9	8.6	2.2	10.8	23.1	7	2.3	9.3	31.8	12.7	3.7	16.4	3.2	1.14	14.2	2.65	13.52	4.275	5.555	7.546	4.718	6.187	6.627	15.853	518.75	2.5	14.15	2.302	65.75	56.75	9	8.9	32.75	32.65	4	36.25	2.5	14.9	2.93	4.55	89	26	93	6.2	4.4	6.5	77.7	5.8	1.91299
CVL_67	26.5	9.1	3.5	12.6	27.75	9.75	3.88	13.63	50.5	22.4	10.4	32.8	2.2	1.26	12.94	2.93	10.74	4.479	6.017	8.983	5.596	6.241	6.829	14.538	497	1.89	11.95	1.896	55	46.25	5.5	15.7	42.25	23.18	5.75	54.5	1.89	19.4	0.52	0	92	0	0	6.4	1.3	1.3	96.7	6.8	1.8437
CVL_68	21.7	6.1	2.7	8.8	27.2	11.8	3.5	15.3	66	41.56	7.67	49.22	2.7	1.4	17.15	2.26	6	4.094	5.437	6.267	3.76	4.906	5.95	13.701	483.25	1.82	12.77	2.031	63.5	48	15	20.8	51.25	28.5	5	52.75	1.82	18.2	0.72	2.01	97	0	0	6.9	1.3	1.3	100	8.7	1.71834
CVL_69	18.7	4.7	2.1	6.8	19.56	5	1.89	6.89	21.8	5.5	1.9	7.4	2.3	1.19	14.56	2.24	8.04	6.315	7.459	10.547	5.521	9.498	7.872	16.175	528	2.81	14.92	2.083	60.75	42.5	13.25	7.6	29.25	31.85	4.25	32	2.81	19.5	0.78	0.41	100	80	80	8.7	5.8	5.8	99.6	7.7	2.40559
CVL_7	20.67	5.56	1.67	7.22	21.2	5.7	2	7.7	22.8	6	1.9	7.9	2.4	1.28	15.41	3.68	11.48	5.135	6.783	9.204	5.099	8.554	8.622	16.878	577.5	3.05	15.13	2.052	52.75	38.5	13.5	7.2	25.25	26.48	3.5	26.5	3.05	18.6	2.5	4.25	100	92	92	8.7	6.4	6.4	100	8.7	2.19826
CVL_70	23.7	8.7	3.8	12.5	27.56	8.33	2.89	11.22	46.75	18.63	8.88	27.5	2.3	1.22	15.76	2.38	11.22	3.954	4.763	6.932	3.593	5.955	4.371	12.11	482.75	1.89	9.43	1.906	61.75	33.5	20.5	11.8	41.25	29.18	4.25	69.75	1.89	20.9	0.91	1.45	100	85	85	8.7	6	6	100	8.7	2.03292
CVL_71	17.6	4.4	2.1	6.5	20	4.67	2.11	6.78	24.11	5.78	2	7.78	2.6	1.45	12.76	1.39	16.91	4.431	5.194	7.858	4.474	5.784	8.51	13.378	505	2.27	14.75	1.99	57.75	39.5	18	6.9	23.75	30.5	3	34.25	2.27	22	1.06	1.43	95	32	33.7	6.6	4.5	4.6	95.4	6.7	1.66796
CVL_72	22.5	6.4	2.5	8.9	33.8	13.8	3.6	17.4	58.67	33.67	7.44	41.11	2.6	0.89	10.6	0.98	7.52	4.525	6.475	8.482	5.644	6.741	7.791	16.172	531.25	2.93	13.98	1.958	45.5	41.25	3.75	21.7	45.5	43.33	5.75	43.25	2.93	17.1	0.38	0.36	100	44	44	8.7	4.8	4.8	100	8.7	1.66061
CVL_73	25.25	8.25	2.13	10.38	29.1	11.9	2.2	14.1	69.22	42.11	7.88	49.63	2.3	1.46	14.24	2.79	12.65	3.521	5.422	7.51	4.605	5.8	6.777	14.43	518	2.35	15.89	2.531	67.25	50	16.75	20	51.25	31.78	5.75	43.5	2.35	22.7	0.47	0.25	100	5	5	8.7	3.4	3.4	100	8.7	1.98021
CVL_74	17.8	4.2	2.1	6.3	19.7	4.9	1.6	6.5	22.3	4.7	2	6.7	2.9	0.81	11.27	1.44	9.48	5.164	5.201	7.985	4.151	7.056	6.857	14.823	515	3.19	10.25	1.854	42.5	36	5.5	6.9	23.75	21.65	3.75	31	3.19	13.6	1.39	3.22	98	17	17.3	7.1	4	4.1	99.6	7.7	2.20832
CVL_8	26.6	10.4	3	13.4	34.56	18.44	5.11	23.56	63.56	37.89	9	46.89	2.9	1.15	9.9	2.1	2.09	3.828	4.98	5.281	3.794	4.71	5.115	13.757	497.75	2.15	11.56	2.083	43.75	36.75	7	29.5	41.25	21.48	9.5	46.25	2.15	19.9	0.61	0.35	93	1	1.1	6.5	2.7	2.7	98.8	7.3	2.04099
CVL_9	19.8	5.2	2	7.2	22	6	2.4	8.4	24.33	6	2.78	8.78	3.2	1.27	17	2.53	5.26	2.908	4.684	6.722	4.084	4.509	4.978	12.129	568.25	2.57	9.4	1.844	45.75	24.5	20.25	7.7	30	20.38	4.5	31.75	2.57	22	0.52	0.24	100	18	18	8.7	4.1	4.1	100	8.7	2.07242
Ler	21.56	6.44	2.67	9.11	25	7.27	3.14	10.41	49.36	23.25	9.21	32.46	NA	NA	NA	NA	NA	NA	NA	NA	NA	NA	NA	NA	477.63	1.93	12.96	1.95	66.38	59.63	5.875	9.98	38.25	29.49	4.13	46.5	1.7	18	2.32	2.88	98.25	8.63	8.73	7.3	3.1	3.6	100	8.7	1.84833
[truncated: 6 more columns]
